# Supplementary material for: Hierarchically structured nickel/molybdenum nitride heterojunctions as superior bifunctional electrodes for overall water splitting
Source: Royal Society of Chemistry journal article supplement (doi:10.1039/d2dt02603a), 2022-01-01
Supplement: d2dt02603a1.pdf [file d2dt02603a1.pdf]

## Supporting Information

### Hierarchically Structured Nickel/Molybdenum Nitrides Heterojunctions as Superior Bifunctional Electrode for Overall Water Splitting

*Pengzuo Chen, Dongmei Feng, Kaixun Li and Yun Tong\**

Department of Chemistry, Key Laboratory of Surface & Interface Science of Polymer  
Materials of Zhejiang Province, Zhejiang Sci-Tech University, Hangzhou 310018,  
China

Correspondence and requests for materials should be addressed to Y. Tong (E-mail:  
tongyun@mail.ustc.edu.cn)

## Table of contents

|                                                                                                                                                                               |    |
|-------------------------------------------------------------------------------------------------------------------------------------------------------------------------------|----|
| <b>Figure S1</b> The XRD pattern of Ni <sub>3</sub> N sample that synthesized from Ni(OH) <sub>2</sub> precursor.....                                                         | 3  |
| <b>Figure S2</b> The TEM images of NiMoO <sub>4</sub> precursor. ....                                                                                                         | 3  |
| <b>Figure S3</b> The TEM images of Ni(OH) <sub>2</sub> /NiMoO <sub>4</sub> precursor.....                                                                                     | 4  |
| <b>Figure S4</b> The TEM images of Ni <sub>3</sub> N@NiMoN <sub>x</sub> sample. ....                                                                                          | 4  |
| <b>Figure S5</b> The SEM images of Ni <sub>3</sub> N@NiMoN <sub>x</sub> /NF sample.....                                                                                       | 5  |
| <b>Figure S6</b> The EDS spectrum of Ni <sub>3</sub> N@NiMoN <sub>x</sub> sample.....                                                                                         | 5  |
| <b>Figure S7</b> The mass normalized Tafel slopes of NiMoO <sub>4</sub> /NF, NiMoN <sub>x</sub> /NF and Ni <sub>3</sub> N@NiMoN <sub>x</sub> /NF samples. ....                | 6  |
| <b>Figure S8</b> The EIS spectra of NiMoO <sub>4</sub> /NF, NiMoN <sub>x</sub> /NF and Ni <sub>3</sub> N@NiMoN <sub>x</sub> /NF samples.....                                  | 6  |
| <b>Figure S9</b> The LSV curves of Ni <sub>3</sub> N@NiMoN <sub>x</sub> /NF catalyst before and after 3000 <sup>th</sup> cycles.....                                          | 7  |
| <b>Figure S10</b> The stability test of Ni <sub>3</sub> N@NiMoN <sub>x</sub> /NF sample for HER in 1 M KOH. ....                                                              | 7  |
| <b>Figure S11</b> The CV curves vs scan rates for a) NF, b) NiMoO <sub>4</sub> /NF, c) NiMoN <sub>x</sub> /NF and d) Ni <sub>3</sub> N@NiMoN <sub>x</sub> /NF catalysts. .... | 8  |
| <b>Figure S12</b> The ECSA normalized current density of NiMoO <sub>4</sub> /NF, NiMoN <sub>x</sub> /NF and Ni <sub>3</sub> N@NiMoN <sub>x</sub> /NF samples for HER.....     | 9  |
| <b>Figure S13</b> The TEM image of Ni <sub>3</sub> N@NiMoN <sub>x</sub> sample after HER test. ....                                                                           | 10 |
| <b>Figure S14</b> The element mapping images of Ni <sub>3</sub> N@NiMoN <sub>x</sub> sample after HER test. ....                                                              | 10 |
| <b>Figure S15</b> The TEM image of Ni <sub>3</sub> N@NiMoN <sub>x</sub> sample after OER test. ....                                                                           | 11 |
| <b>Table S1</b> The atomic content of each elements in Ni <sub>3</sub> N@NiMoN <sub>x</sub> sample .....                                                                      | 11 |

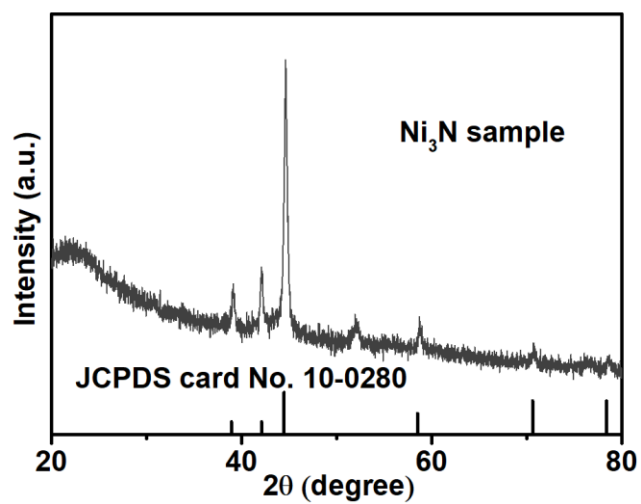

**Figure S1** The XRD pattern of Ni<sub>3</sub>N sample that synthesized from Ni(OH)<sub>2</sub> precursor.

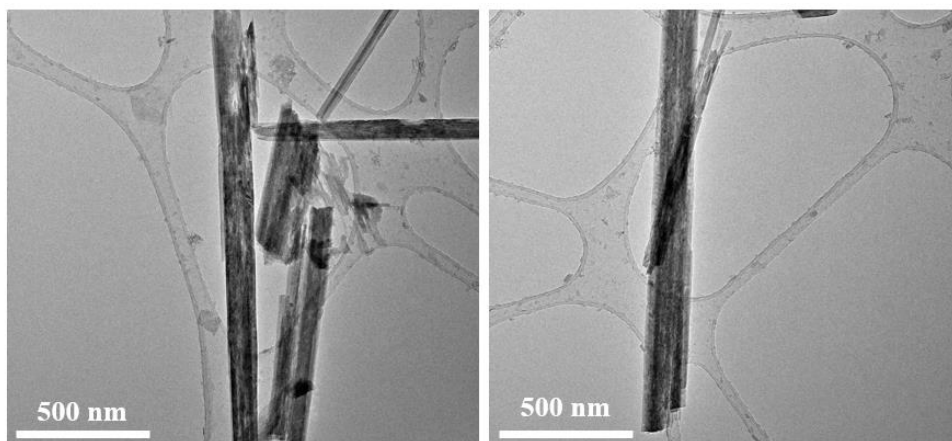

**Figure S2** The TEM images of NiMoO<sub>4</sub> precursor.

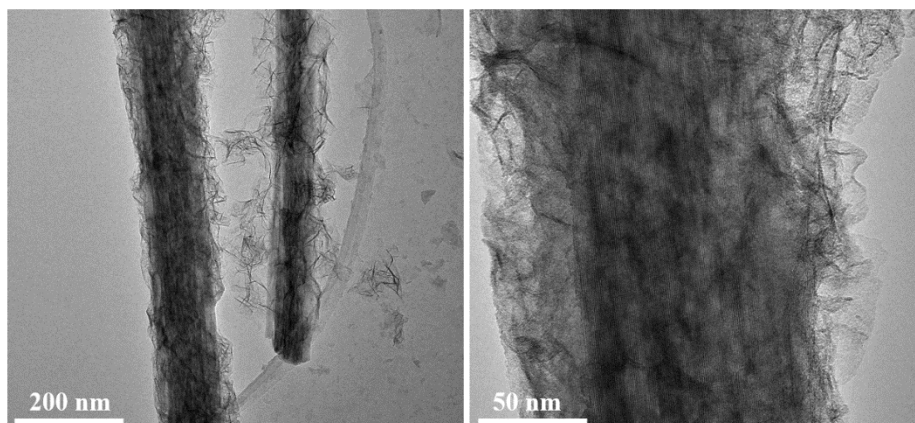

**Figure S3** The TEM images of Ni(OH)<sub>2</sub>/NiMoO<sub>4</sub> precursor.

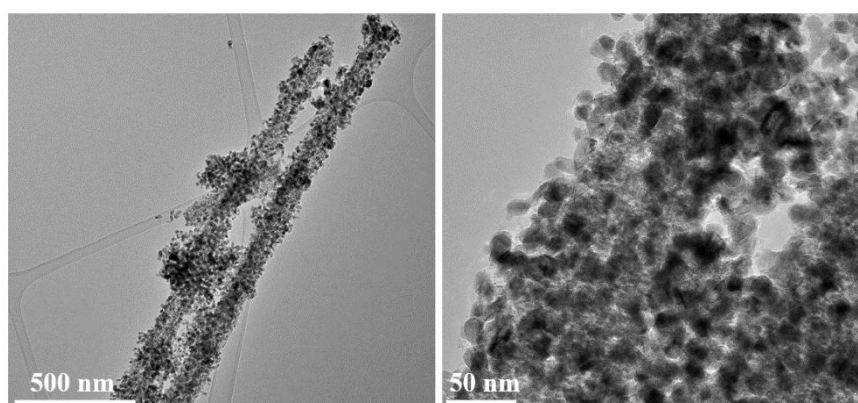

**Figure S4** The TEM images of Ni<sub>3</sub>N@NiMoN<sub>x</sub> sample.

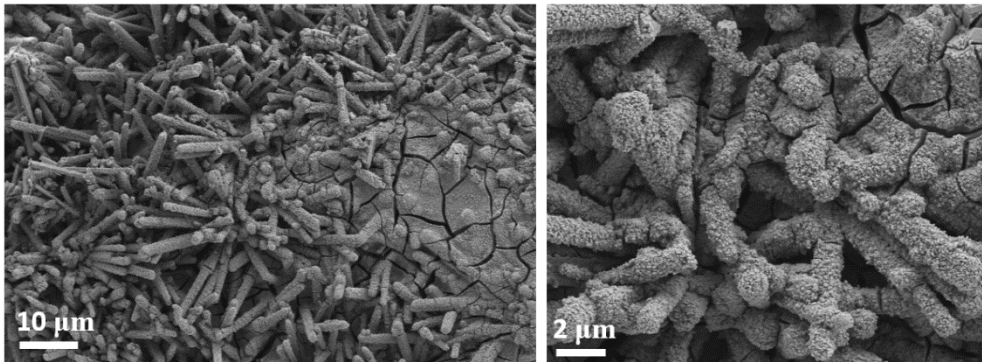

**Figure S5** The SEM images of  $\text{Ni}_3\text{N}@\text{NiMoN}_x/\text{NF}$  sample.

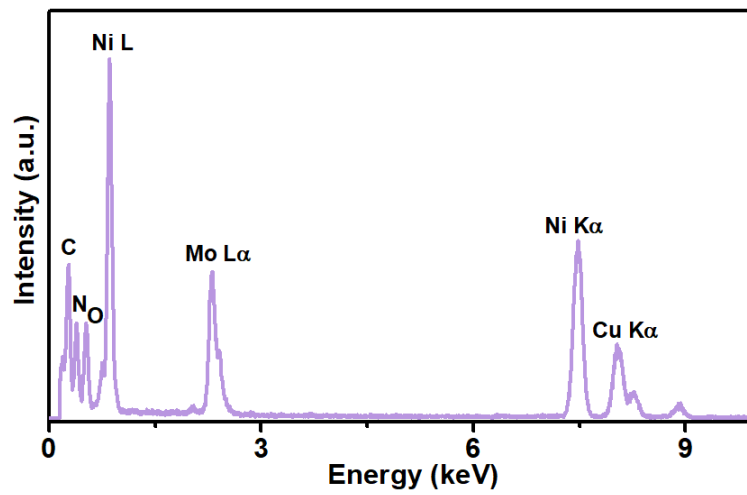

**Figure S6** The EDS spectrum of  $\text{Ni}_3\text{N}@\text{NiMoN}_x$  sample.

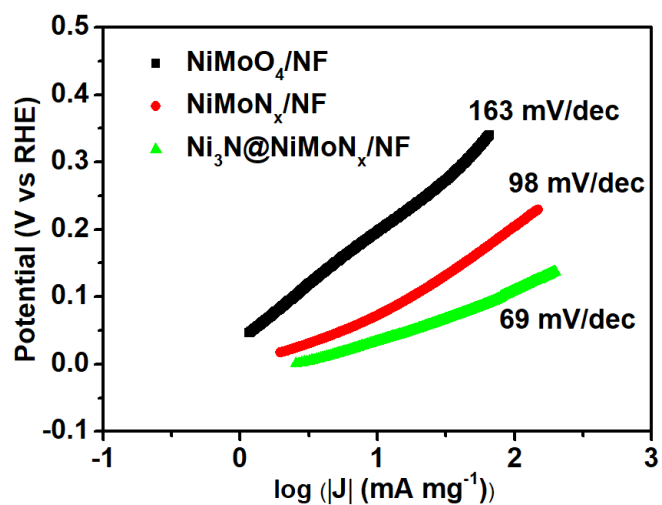

**Figure S7** The mass normalized Tafel slopes of NiMoO<sub>4</sub>/NF, NiMoN<sub>x</sub>/NF and Ni<sub>3</sub>N@NiMoN<sub>x</sub>/NF samples.

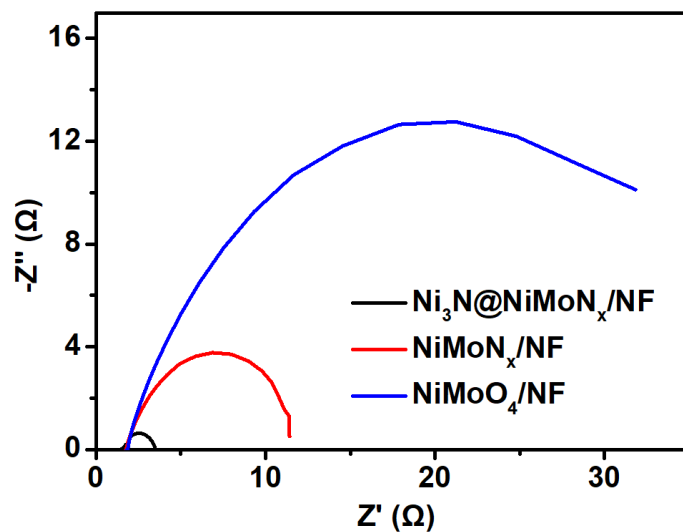

**Figure S8** The EIS spectra of NiMoO<sub>4</sub>/NF, NiMoN<sub>x</sub>/NF and Ni<sub>3</sub>N@NiMoN<sub>x</sub>/NF samples.

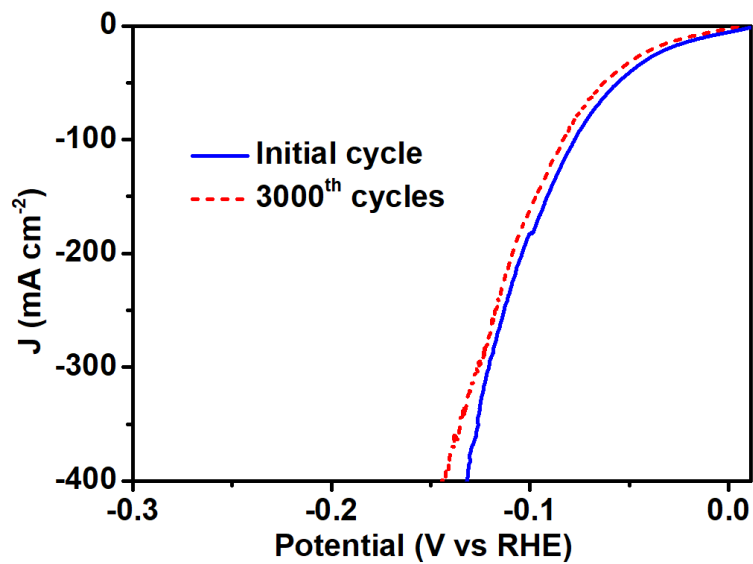

**Figure S9** The LSV curves of Ni<sub>3</sub>N@NiMoN<sub>x</sub>/NF catalyst before and after 3000<sup>th</sup> cycles.

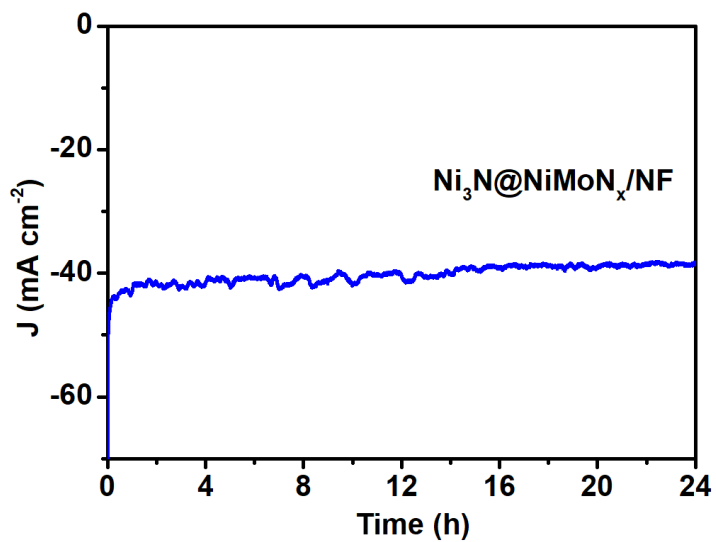

**Figure S10** The stability test of Ni<sub>3</sub>N@NiMoN<sub>x</sub>/NF sample for HER in 1 M KOH.

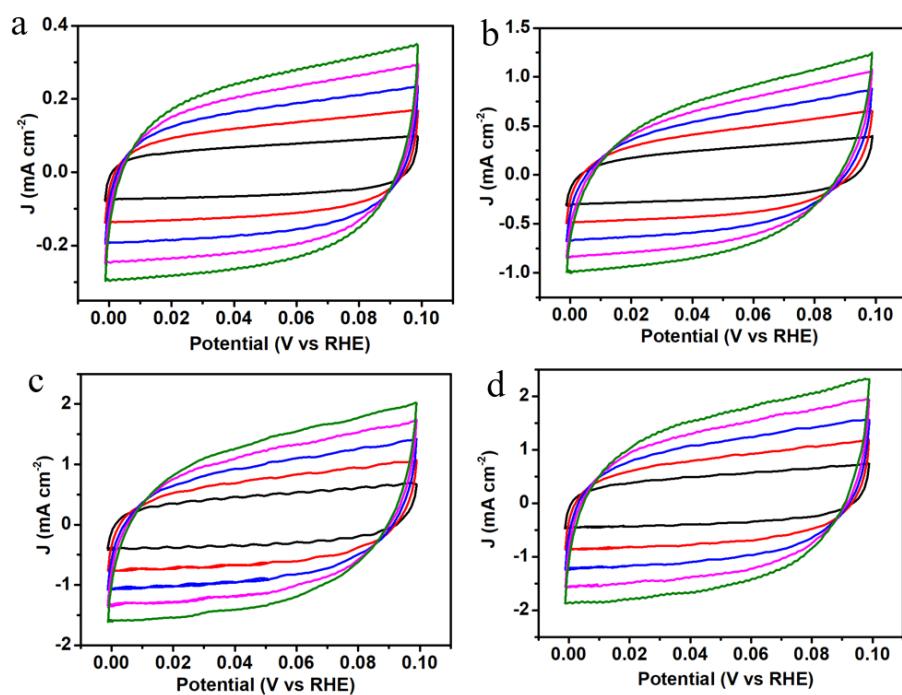

**Figure S11** The CV curves vs scan rates for a) NF, b)  $\text{NiMoO}_4/\text{NF}$ , c)  $\text{NiMoN}_x/\text{NF}$  and d)  $\text{Ni}_3\text{N}@/\text{NiMoN}_x/\text{NF}$  catalysts.



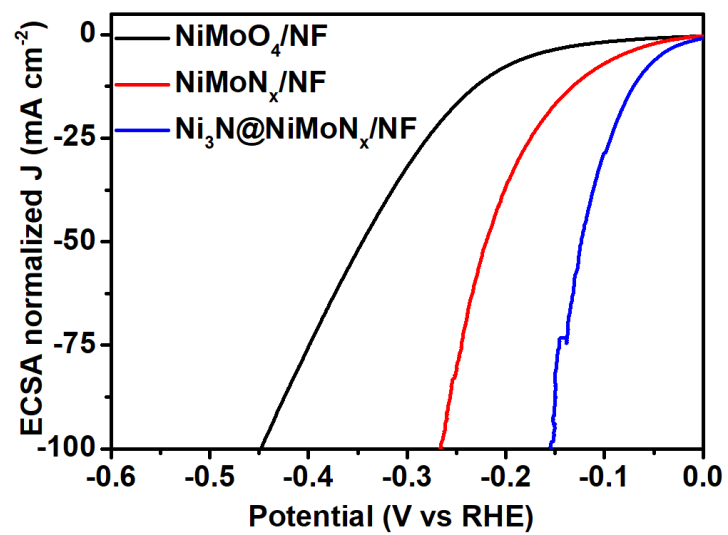

**Figure S12** The ECSA normalized current density of NiMoO<sub>4</sub>/NF, NiMoN<sub>x</sub>/NF and Ni<sub>3</sub>N@NiMoN<sub>x</sub>/NF samples for HER.

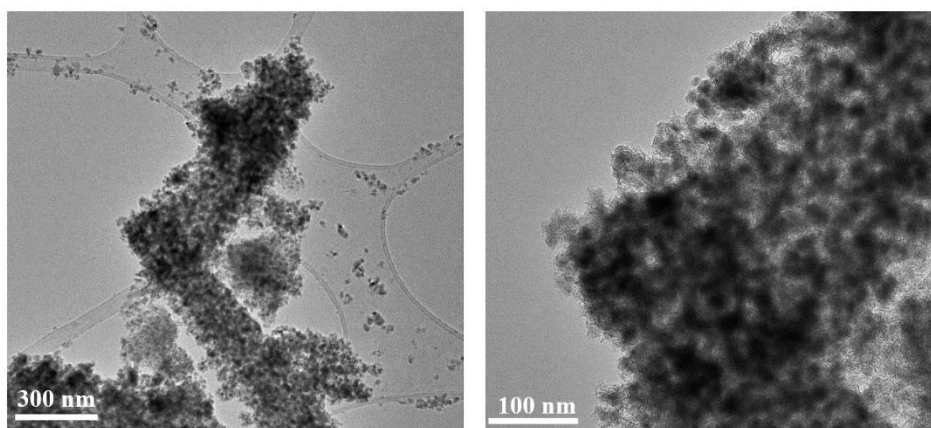

**Figure S13** The TEM image of  $\text{Ni}_3\text{N}@ \text{NiMoN}_x$  sample after HER test.

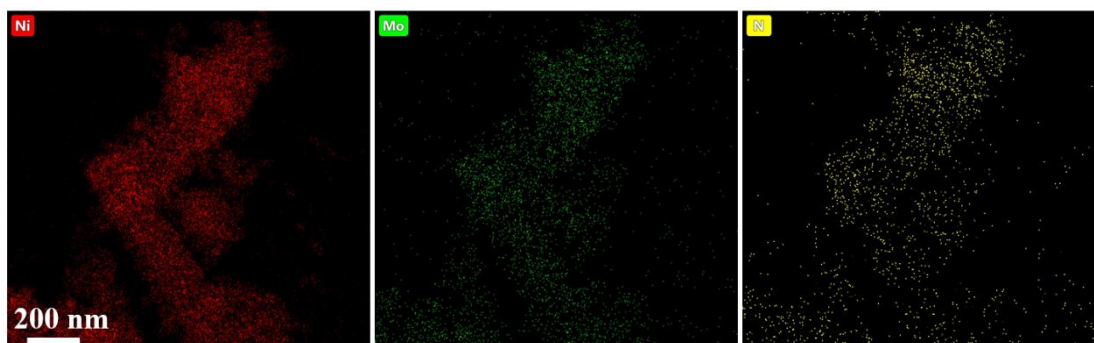

**Figure S14** The element mapping images of  $\text{Ni}_3\text{N}@ \text{NiMoN}_x$  sample after HER test.

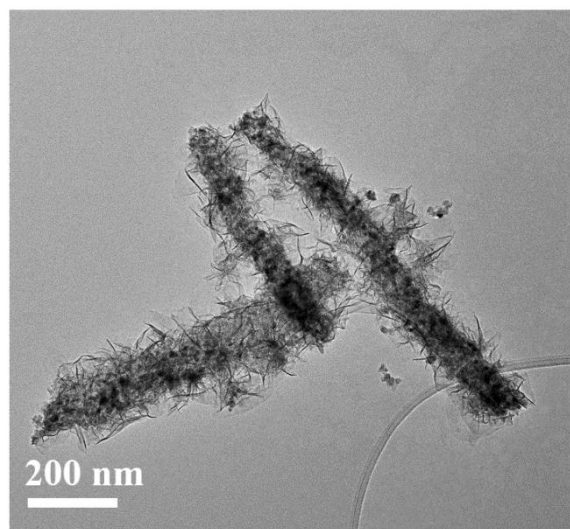

**Figure S15** The TEM image of  $\text{Ni}_3\text{N@NiMoN}_x$  sample after OER test.

**Table S1** The atomic content of each elements in  $\text{Ni}_3\text{N@NiMoN}_x$  sample

| Catalyst                      | Atomic content of each elements (%) |    |    |
|-------------------------------|-------------------------------------|----|----|
|                               | Ni                                  | Mo | N  |
| $\text{Ni}_3\text{N@NiMoN}_x$ | 52                                  | 35 | 13 |
